# Supplementary material for: Phosphorylation of Syntaxin 4 by the Insulin Receptor Drives Exocytic SNARE Complex Formation to Deliver GLUT4 to the Cell Surface
Source: MDPI journal article supplement (doi:10.3390/biom13121738), 2023-12-02

Figure S1. Original Western Blotting Figures of Figure 1A,B

A

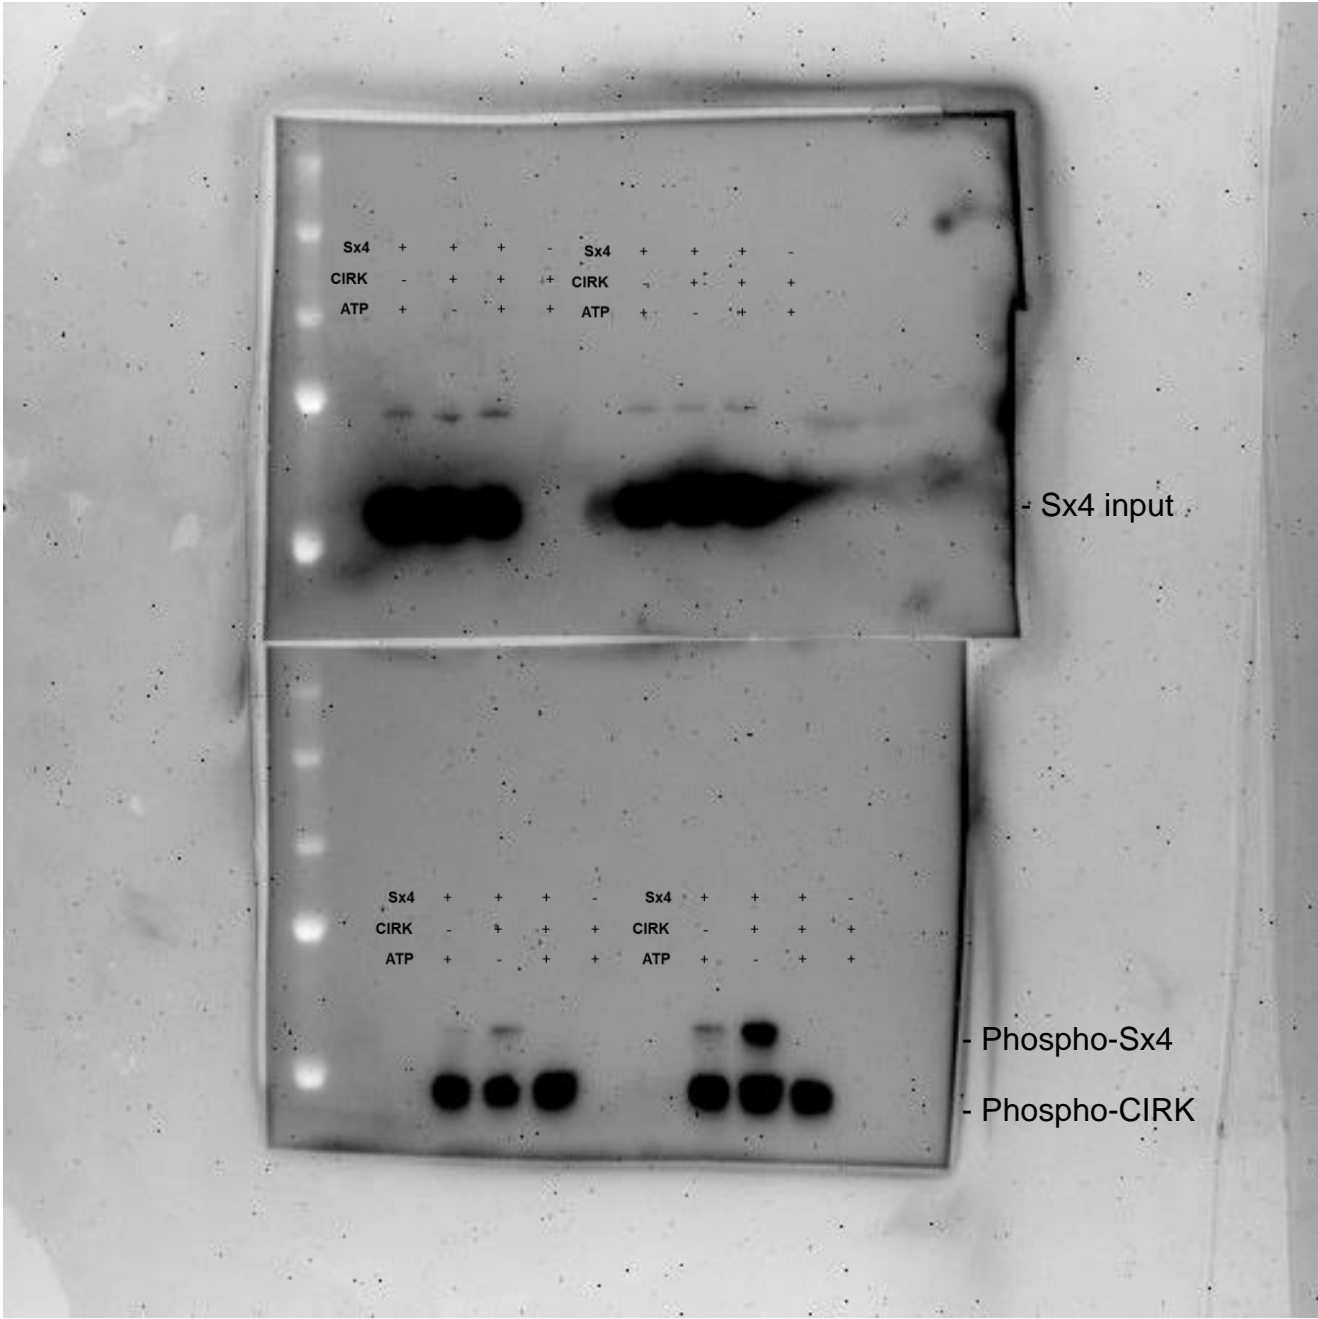

**B**

| Sx4  | WT | WT | 115 | 115 | 251 | 251 | DbI | DbI |   |
|------|----|----|-----|-----|-----|-----|-----|-----|---|
| CIRK | -  | +  | -   | +   | -   | +   | -   | +   | + |

Normal 10% gel

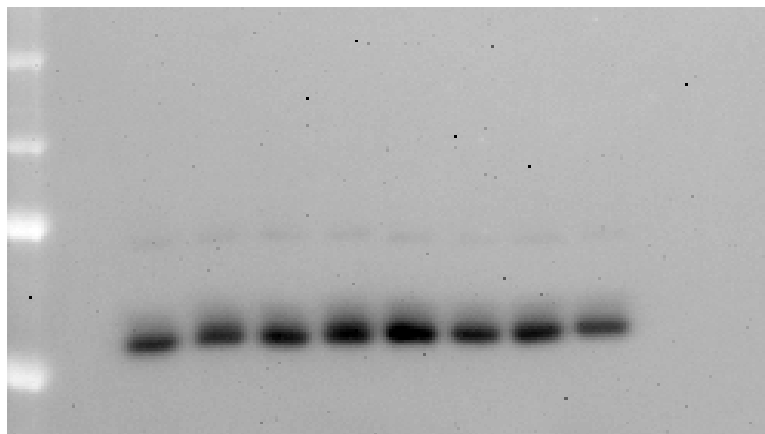

Sx4

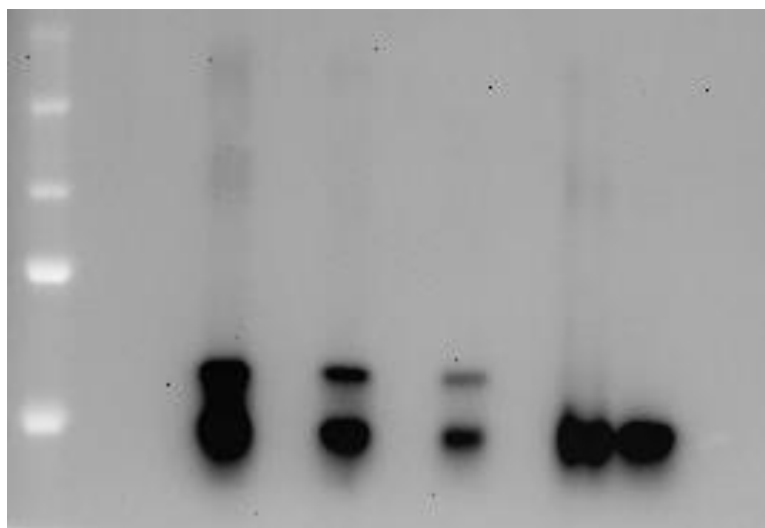

Sx4-P

CIRK

# Figure S2. Original Western Blotting Figures of Figure 2A

First assay

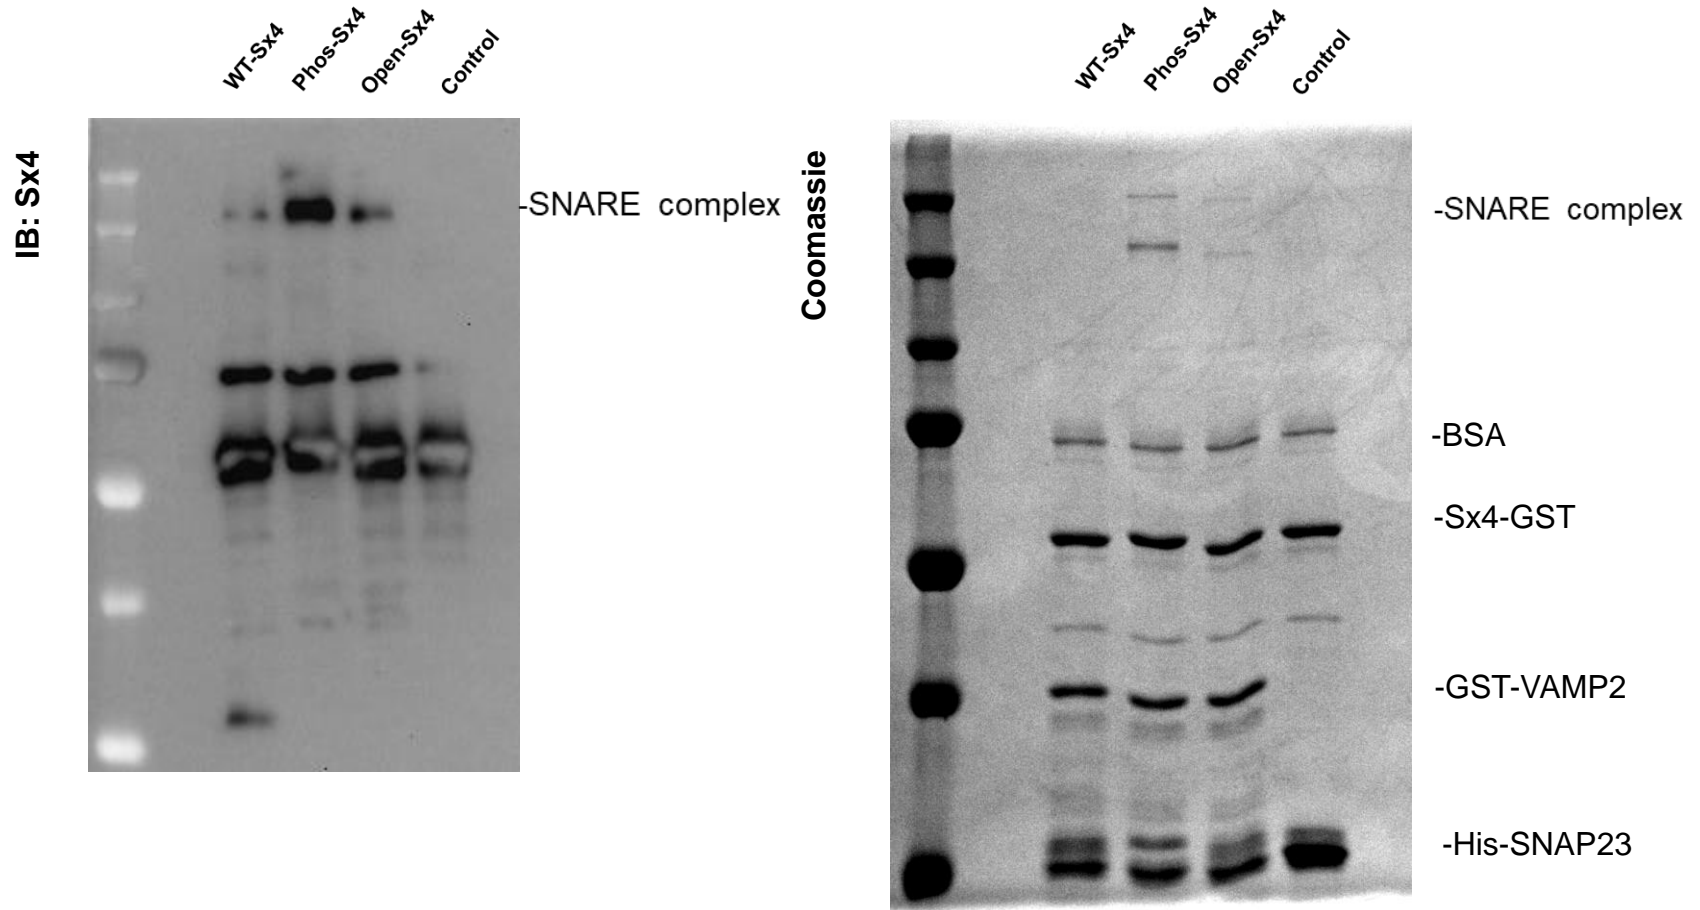

## Second assay

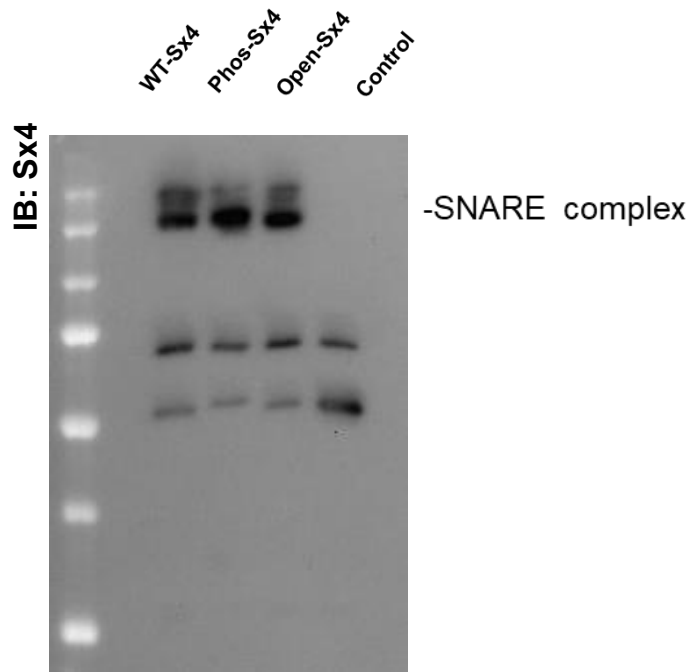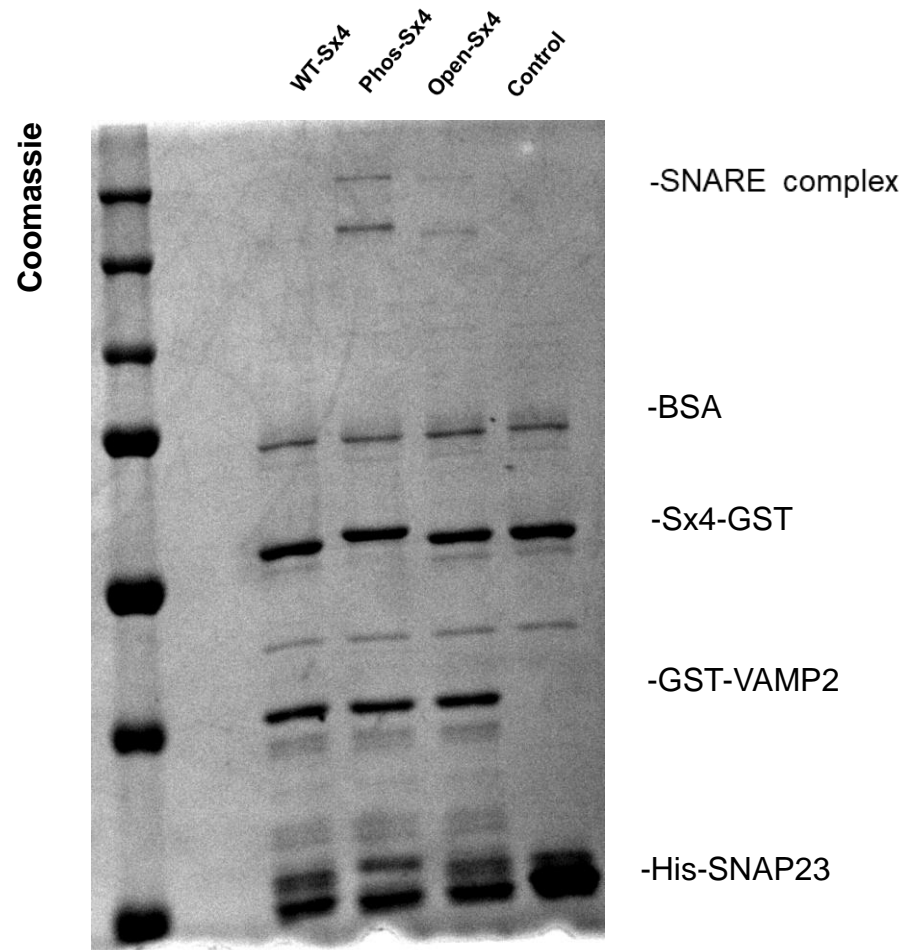

### Third assay

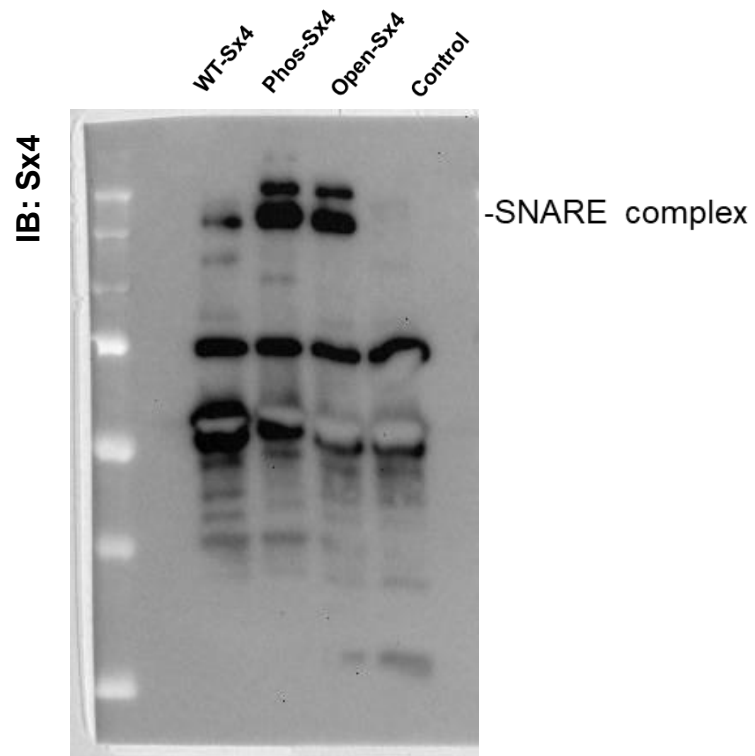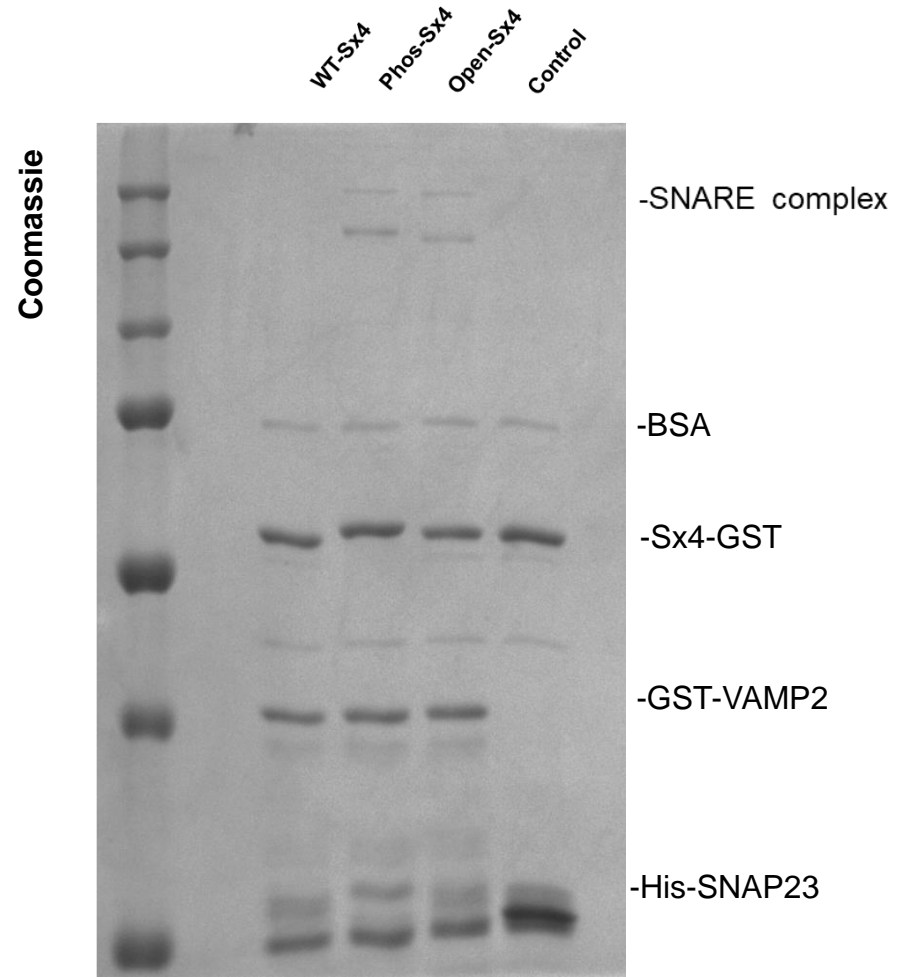

**Figure S3. Original Western Blotting Figures of Figure 3A,C,D**  
First assay

**A**

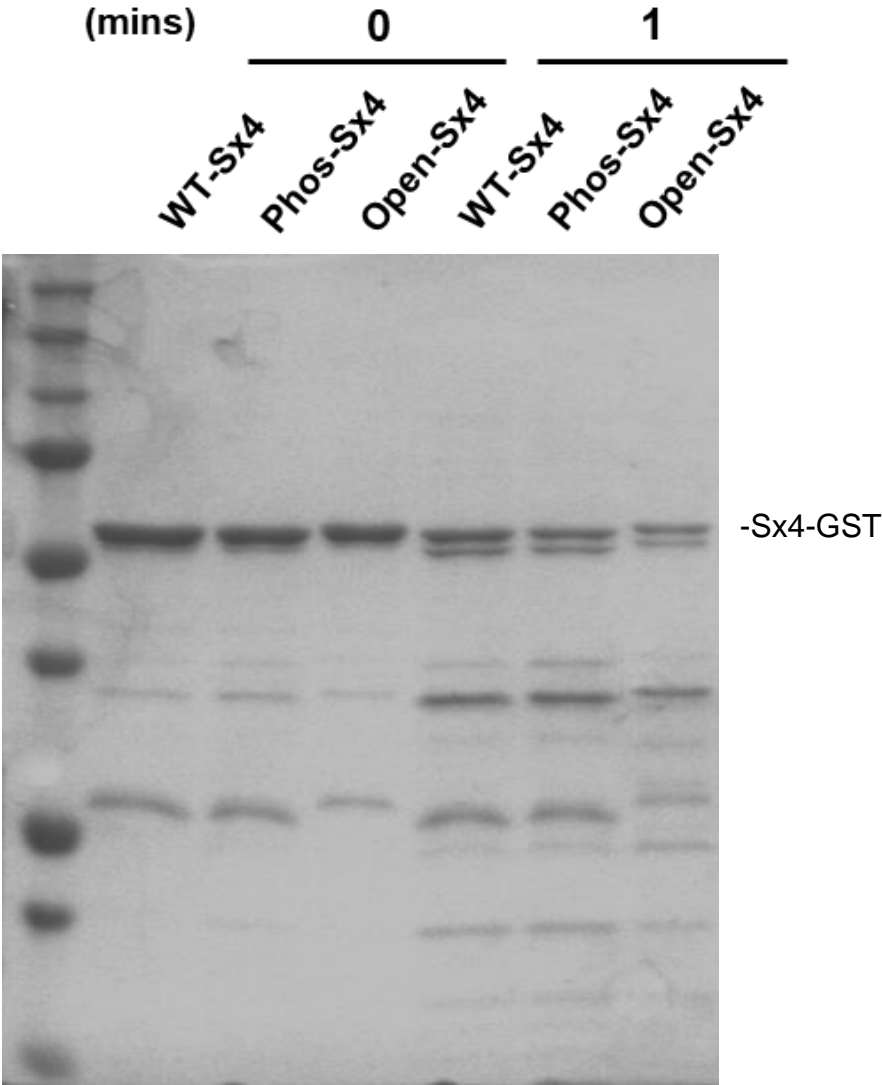

**A**

Second assay

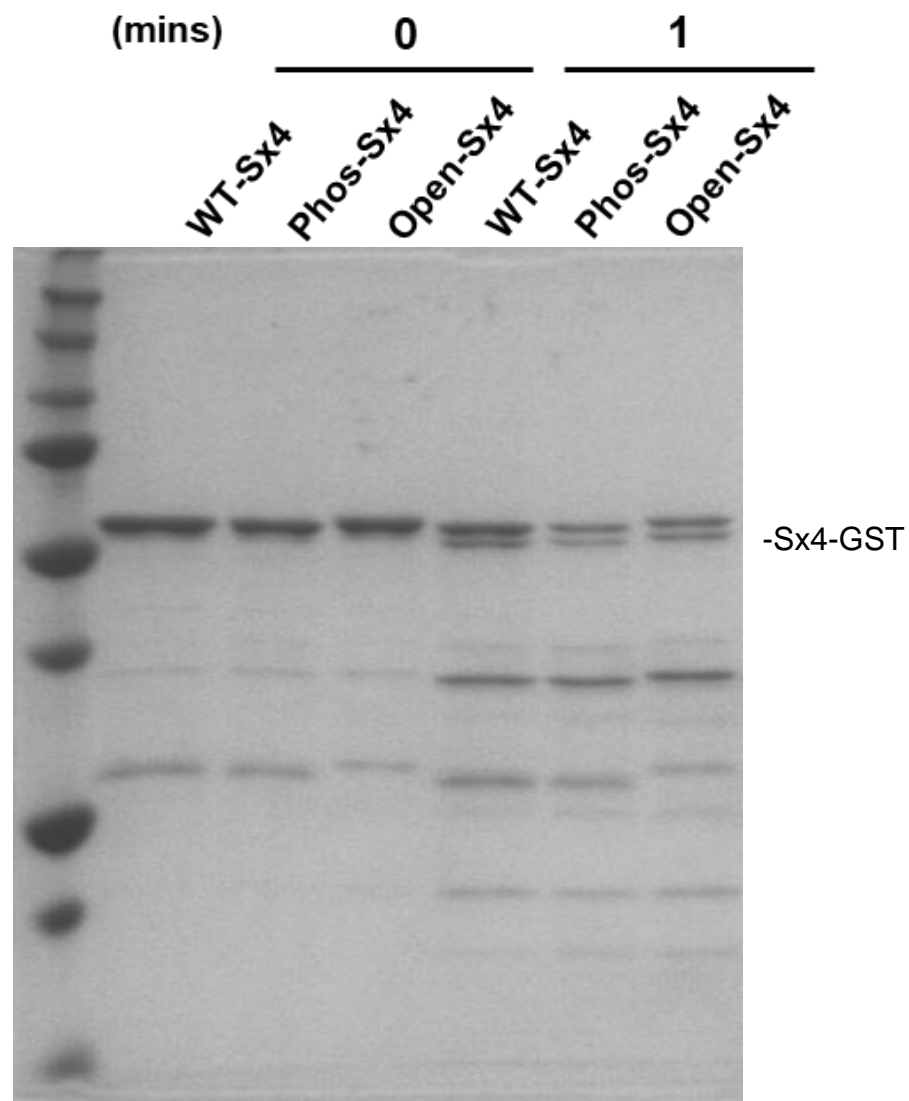

**A**

Third assay

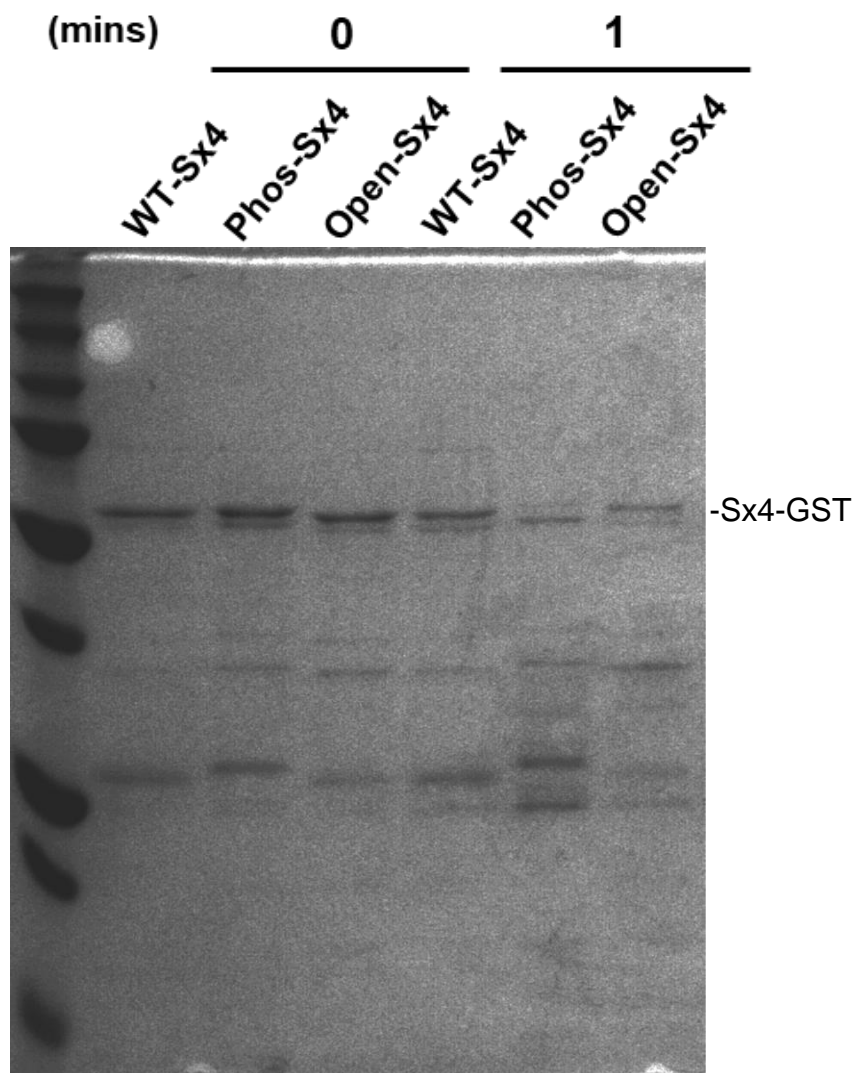



C

## First assay

WT-Sx4

Phos-Sx4

**Open-Sx4**

**GST**

**S23 input**

30 60 30 60 30 60 60

**IB:S23**

- SNAP23

**Coomassie**

- Sx4

- GST

- SNAP23

C

Second assay

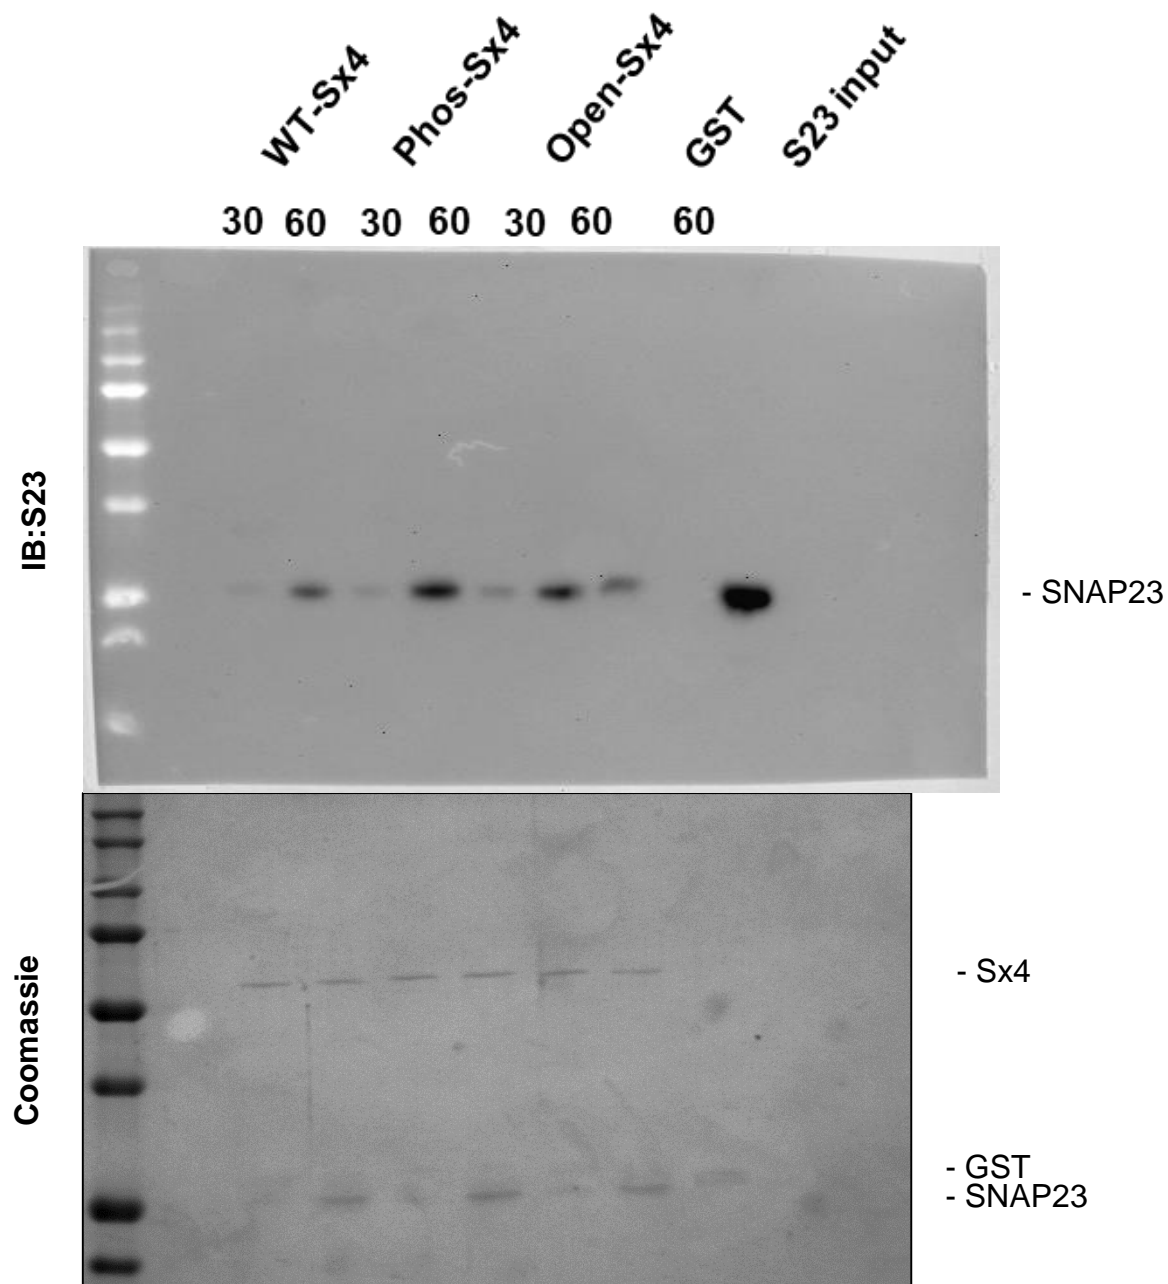

C

Third assay

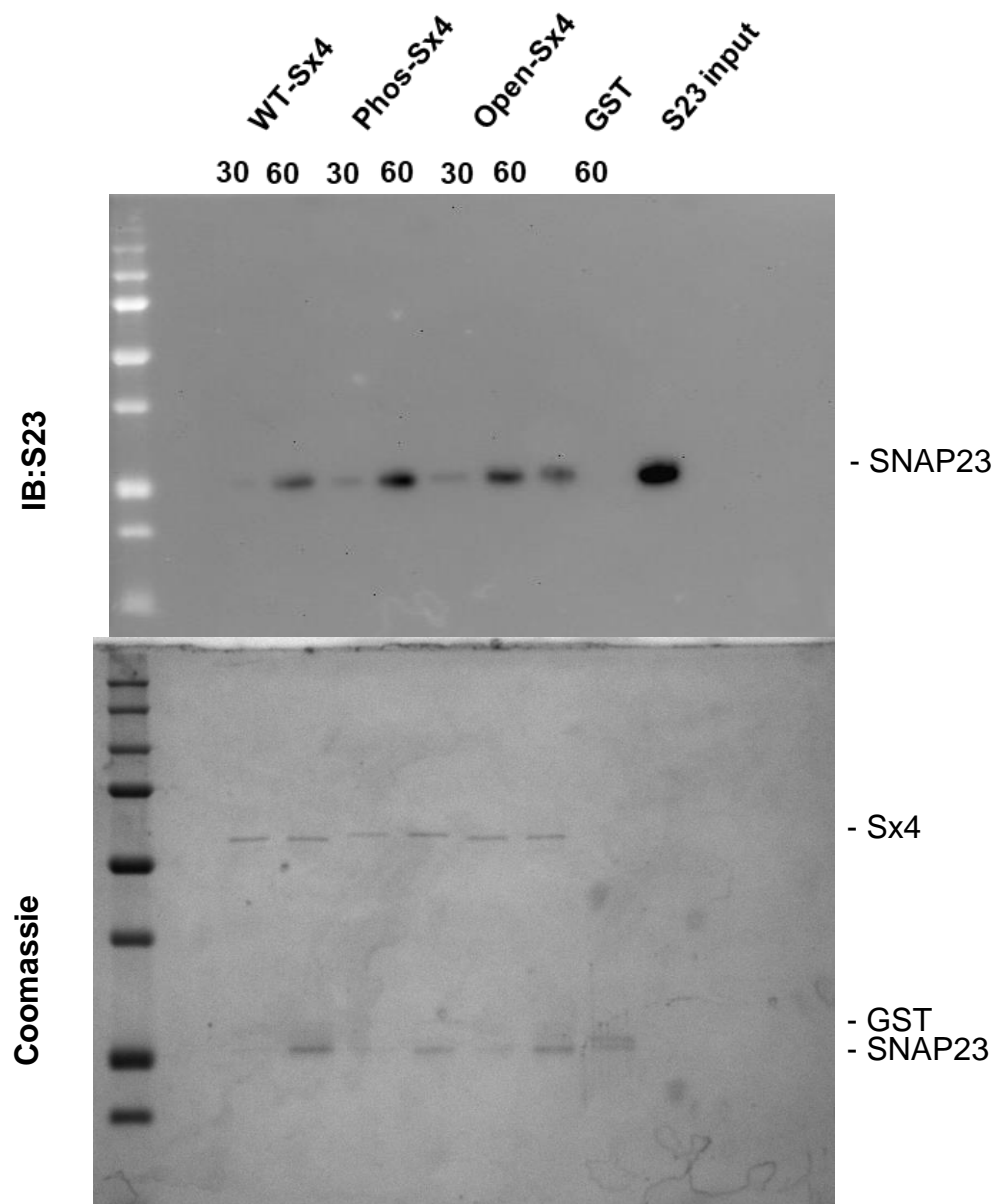

**D**

First assay

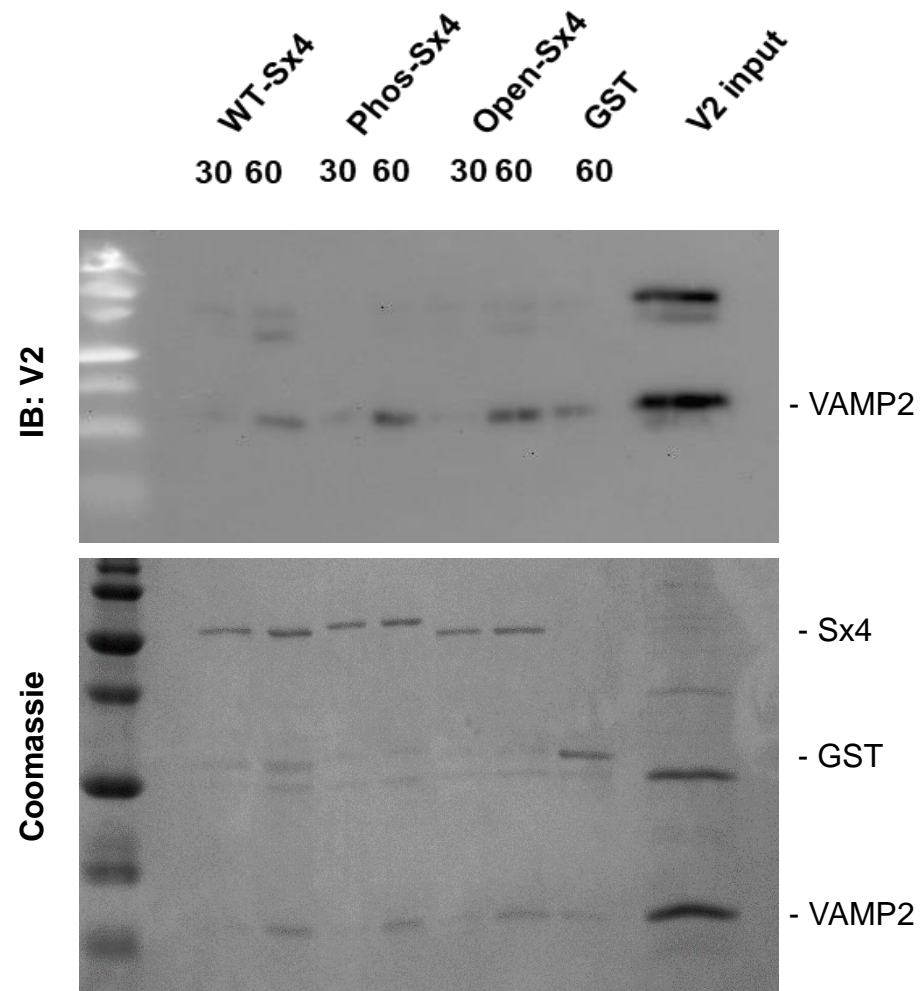

**D**

Second assay

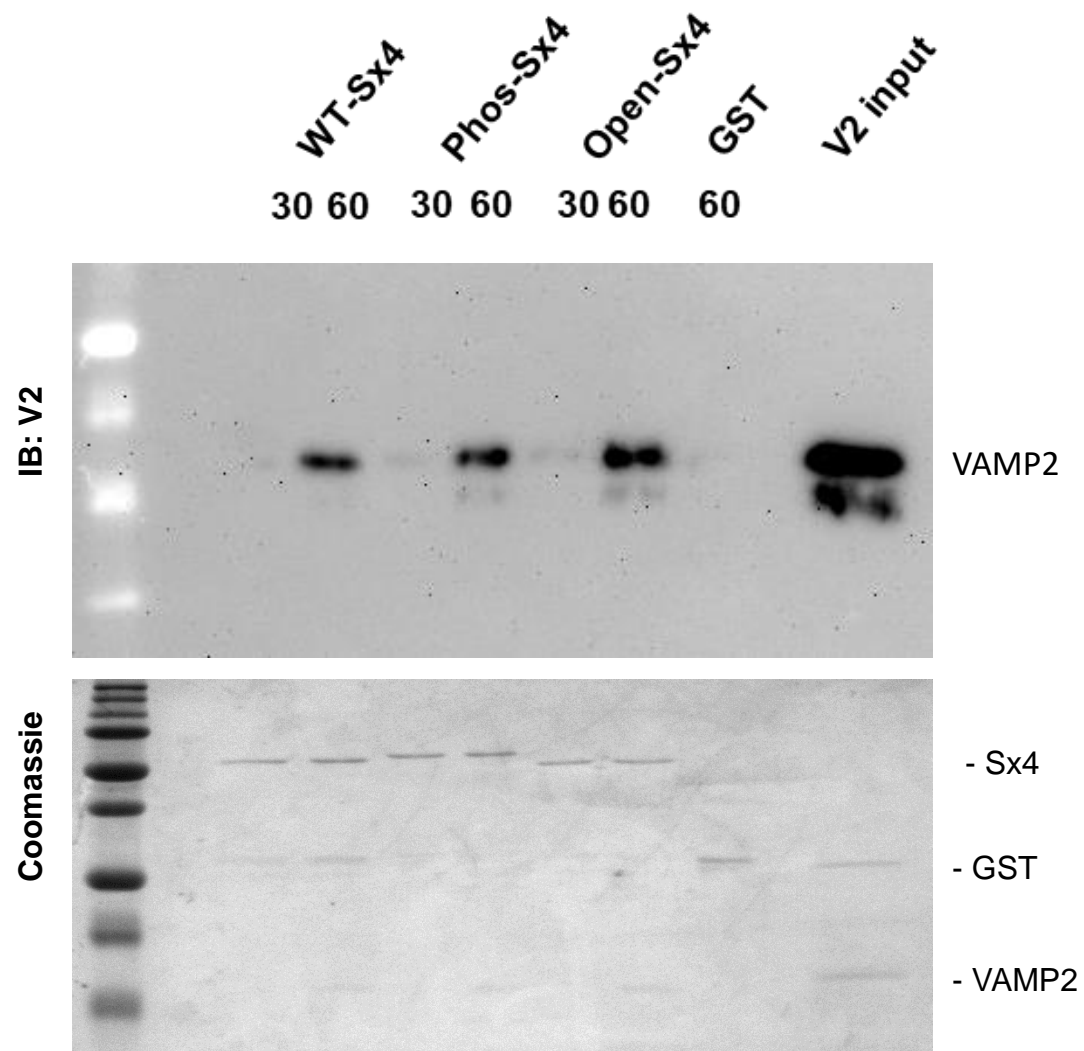

**D**

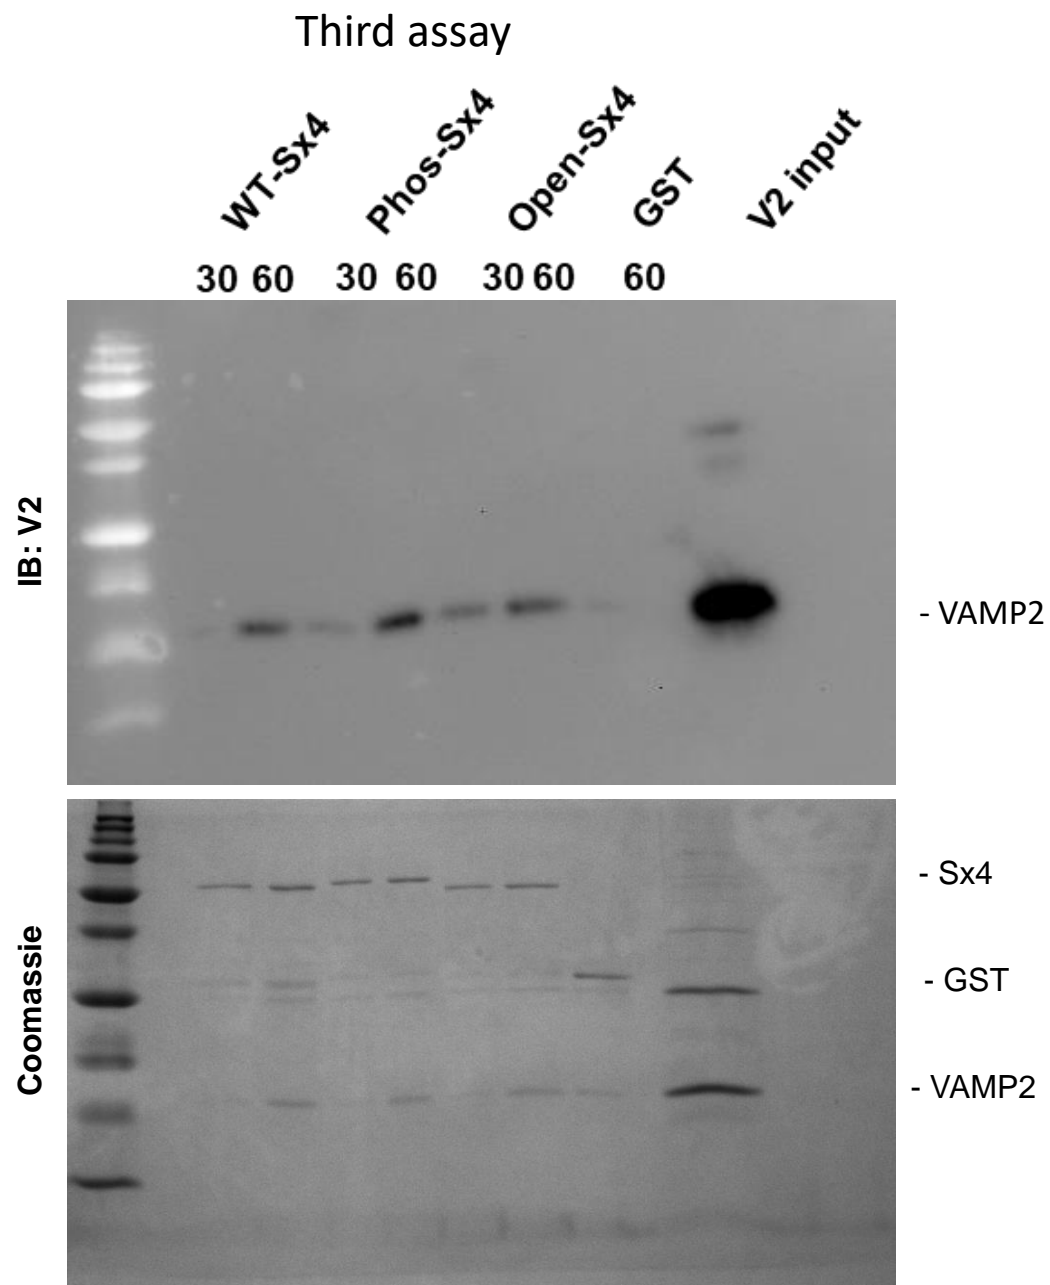

**Figure S4. Original Western Blotting Figures of Figure 5A**

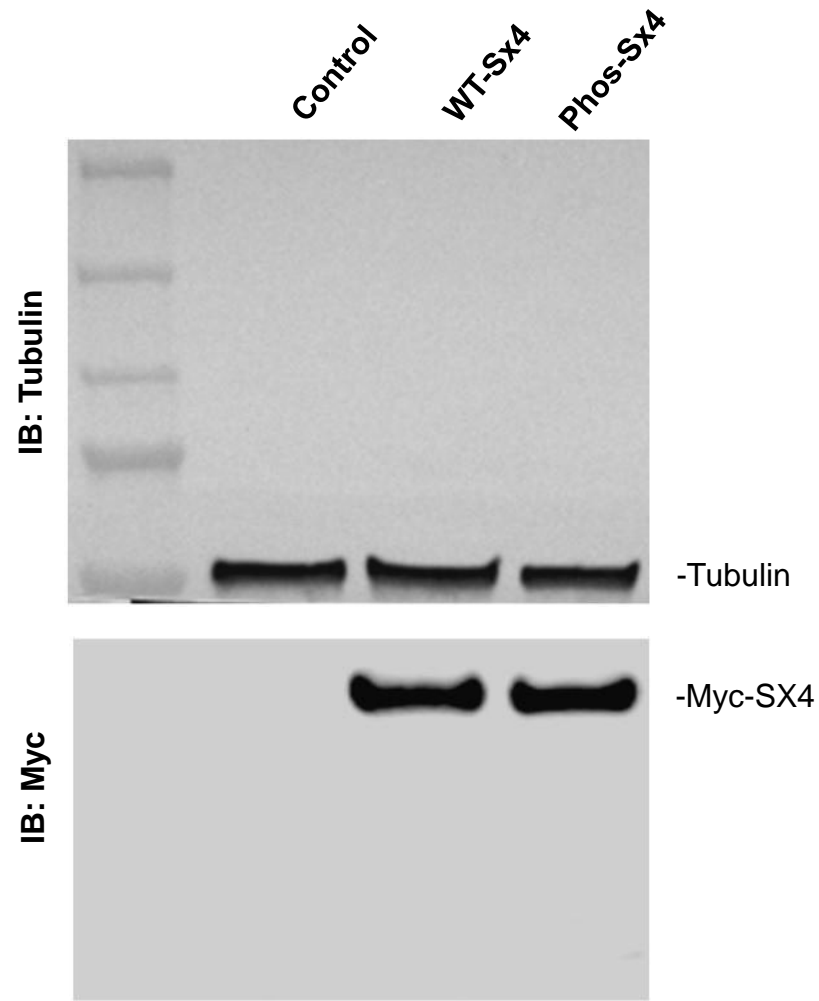

Supplement: s1 [file s1]
